# Supplementary material for: Immune response following a two-dose schedule of bivalent HPV vaccination among girls and boys
Source: PubMed Central journal article supplement (PMC10853341; doi:10.3389/fimmu.2024.1327770), 2024-01-26
Supplement: DataSheet_1.pdf [file DataSheet_1.pdf]

**Supplementary Table 1.** Model-based prediction of GMCs following 2vHPV vaccination. GMCs predicted from the exponential model, using antibody data measured up to 7.5 years after the second dose of vaccination among girls (birth cohort 2001).

| Type  | Initial GMC (LU/mL)    | Plateau GMC (LU/mL) | 50% of initial GMC w.r.t. plateau (years) | 25% of initial GMC w.r.t. plateau (years) | GMC ratio sexual debut |
|-------|------------------------|---------------------|-------------------------------------------|-------------------------------------------|------------------------|
| HPV16 | 6270.6 (5053.5-7806.3) | 648.4 (488.1-842.7) | 1.4 (1.1-1.9)                             | 2.8 (2.2-3.8)                             | 1.1 (0.9-1.2)          |
| HPV18 | 5502.3 (4353.2-6964.7) | 210.1 (151.5-296.9) | 1.7 (1.4-2.2)                             | 3.5 (2.8-4.3)                             | 1.1 (0.9-1.3)          |
| HPV31 | 156.7 (111.7-222.9)    | 16.3 (12.5-21.4)    | 0.5 (0.4-0.6)                             | 0.9 (0.8-1.1)                             | 1.4 (1.2-1.6)          |
| HPV33 | 44.1 (30.6-68.1)       | 6.9 (5.2-9.5)       | 0.5 (0.3-0.7)                             | 1.0 (0.6-1.4)                             | 1.5 (1.2-1.8)          |
| HPV45 | 243.9 (168.6-349.6)    | 25.2 (17.8-34.8)    | 0.8 (0.5-1.1)                             | 1.5 (1.0-2.2)                             | 1.2 (1.0-1.5)          |
| HPV52 | 98.0 (68.6-135.4)      | 10.5 (7.9-13.8)     | 0.5 (0.3-0.7)                             | 0.9 (0.6-1.4)                             | 1.4 (1.2-1.7)          |
| HPV58 | 138.1 (93.2-197.3)     | 12.1 (8.5-16.3)     | 0.7 (0.6-0.8)                             | 1.4 (1.1-1.7)                             | 1.5 (1.2-1.7)          |

LU: Luminex units; w.r.t: with respect to

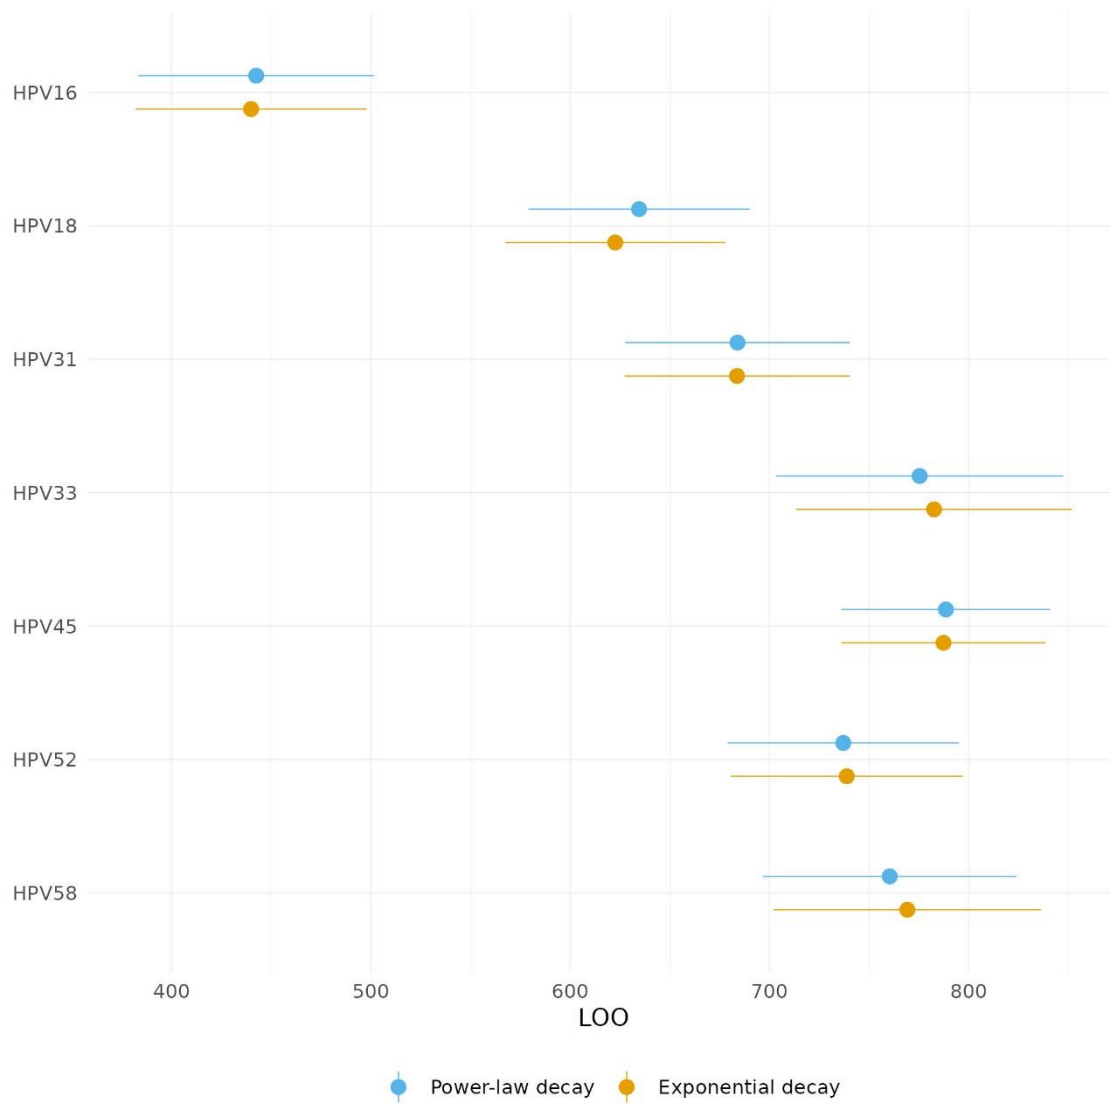

**Supplementary Figure 2.** Leave-one-out crossvalidation information criterion and their corresponding 95% CIs for each HPV type for the power-law decay model and exponential decay model.

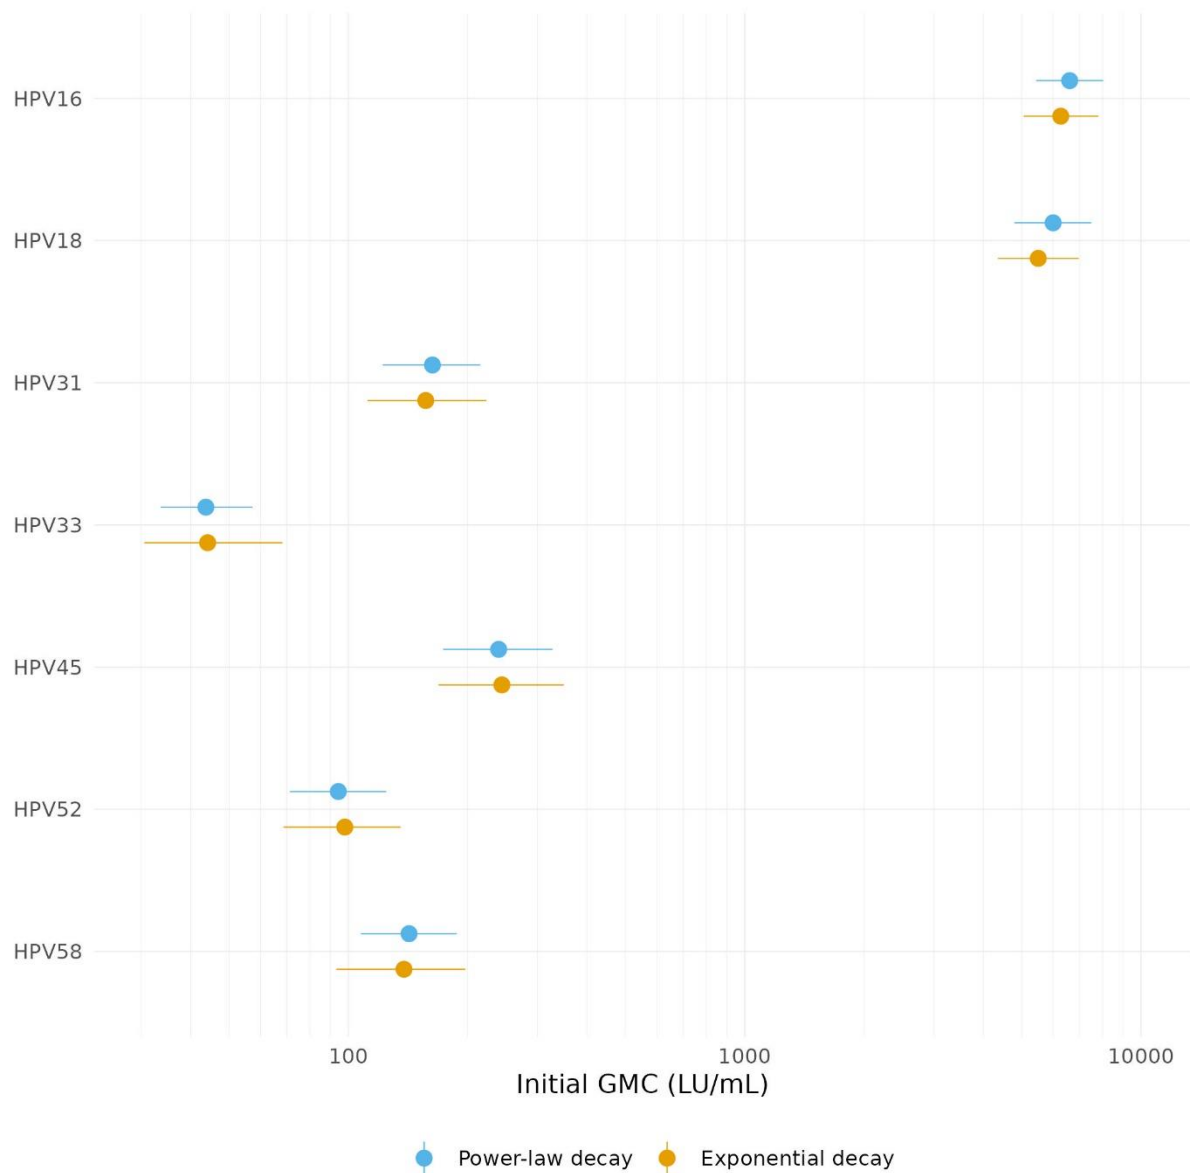

**Supplementary Figure 2.** Estimated initial GMC (LU/ml) and their corresponding 95% CIs for each HPV type just after the second dosis for the power-law decay model and exponential decay model.

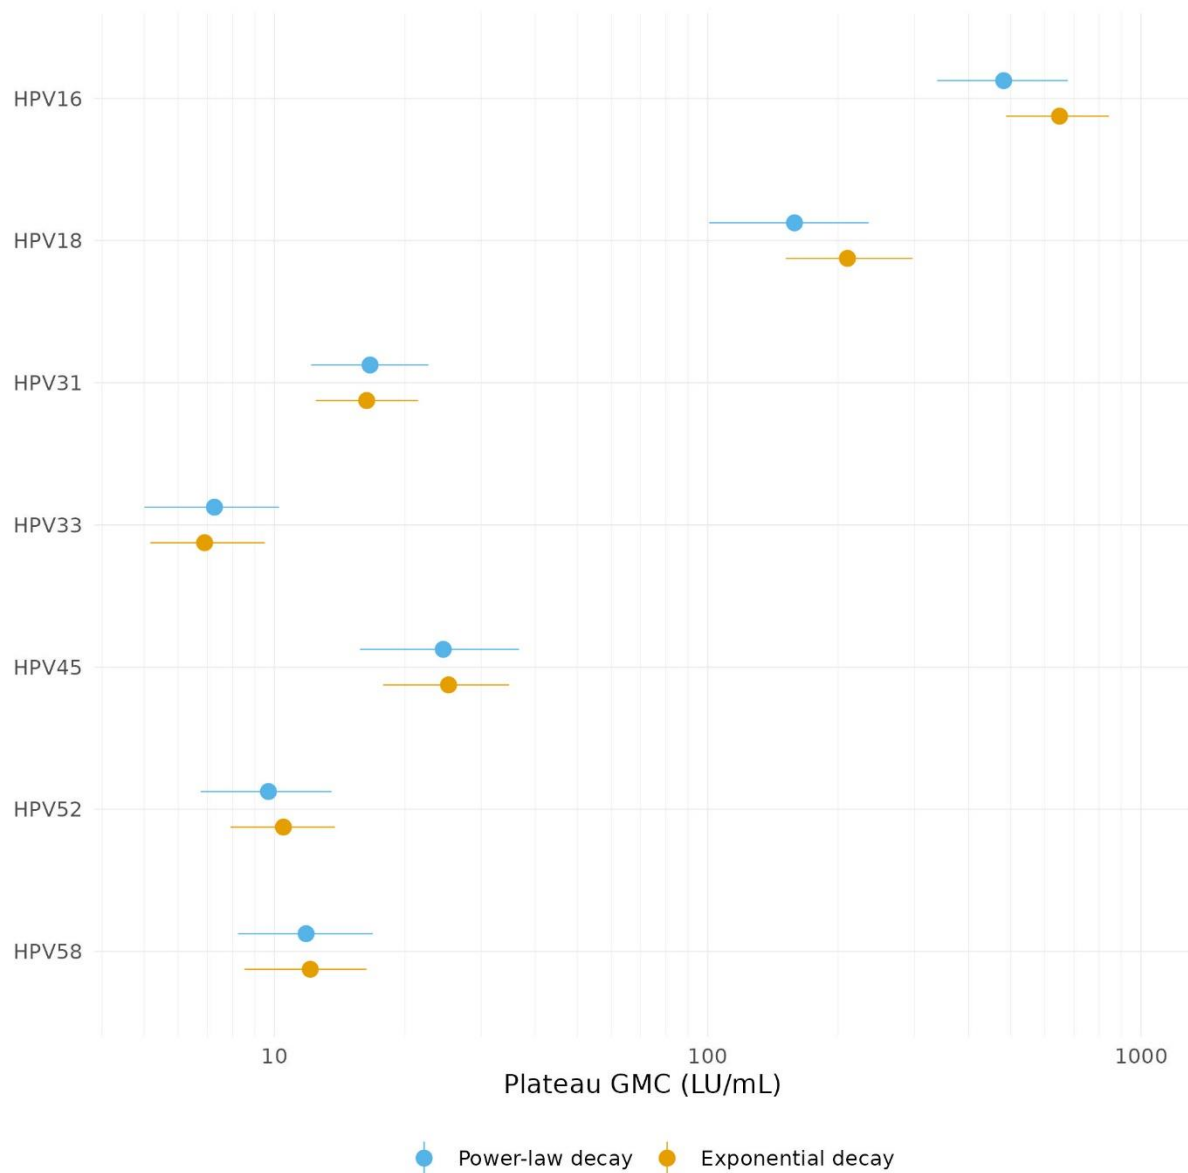

**Supplementary Figure 3.** Estimated plateau GMC (LU/ml) and their corresponding 95% CIs for each HPV type for the power-law decay model and exponential decay model.

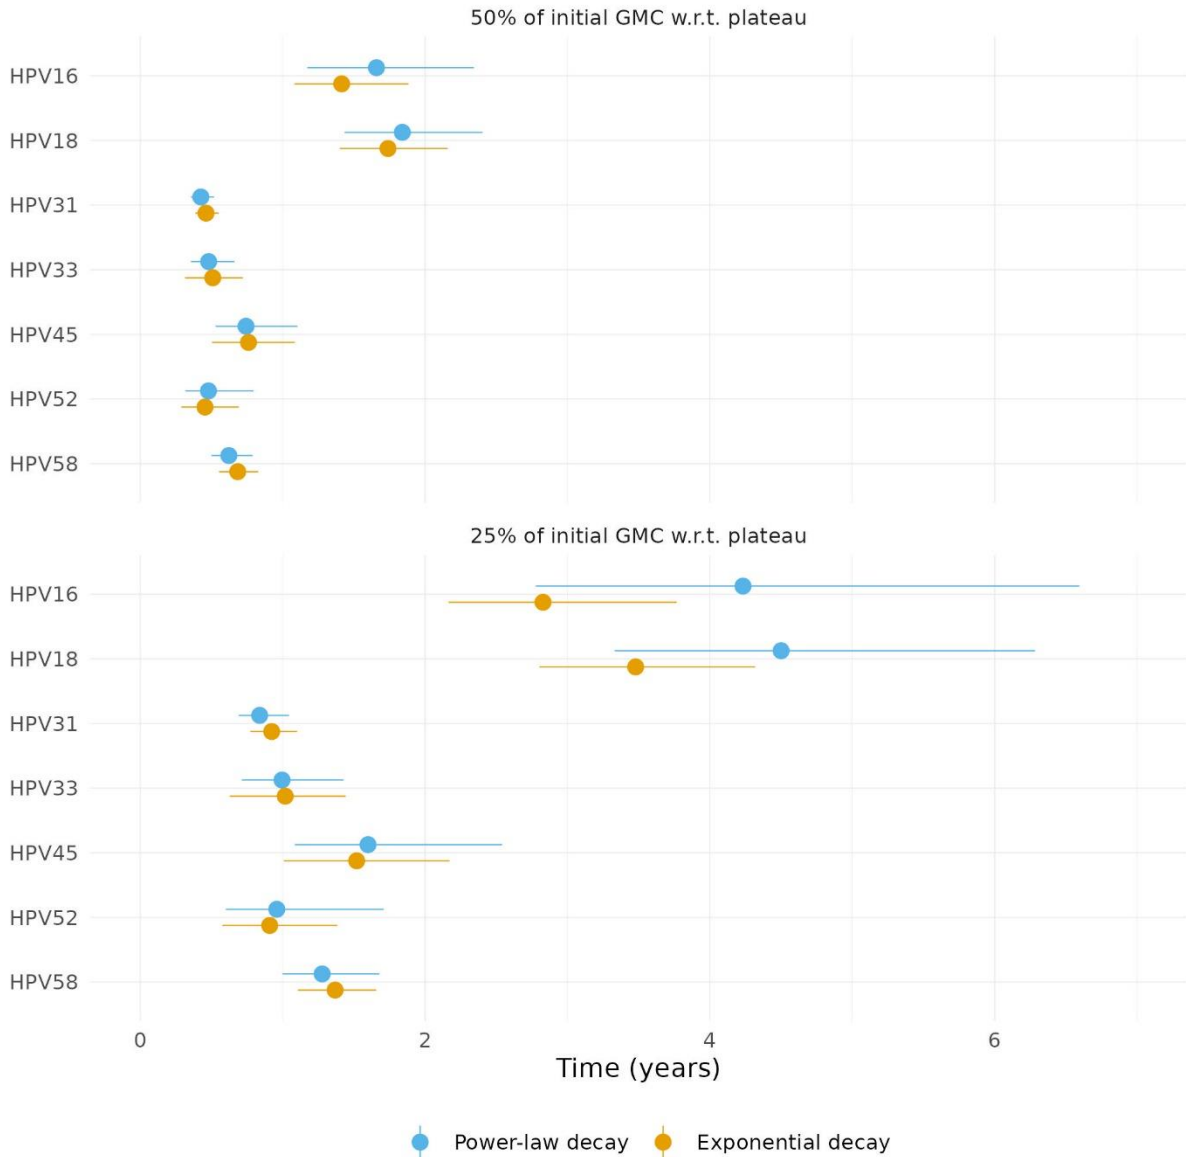

**Supplementary Figure 4.** Time in years to reach 50% (left) and 25% of the initial GMC with respect to the plateau GMC for each HPV type for the power-law decay model and exponential decay model.

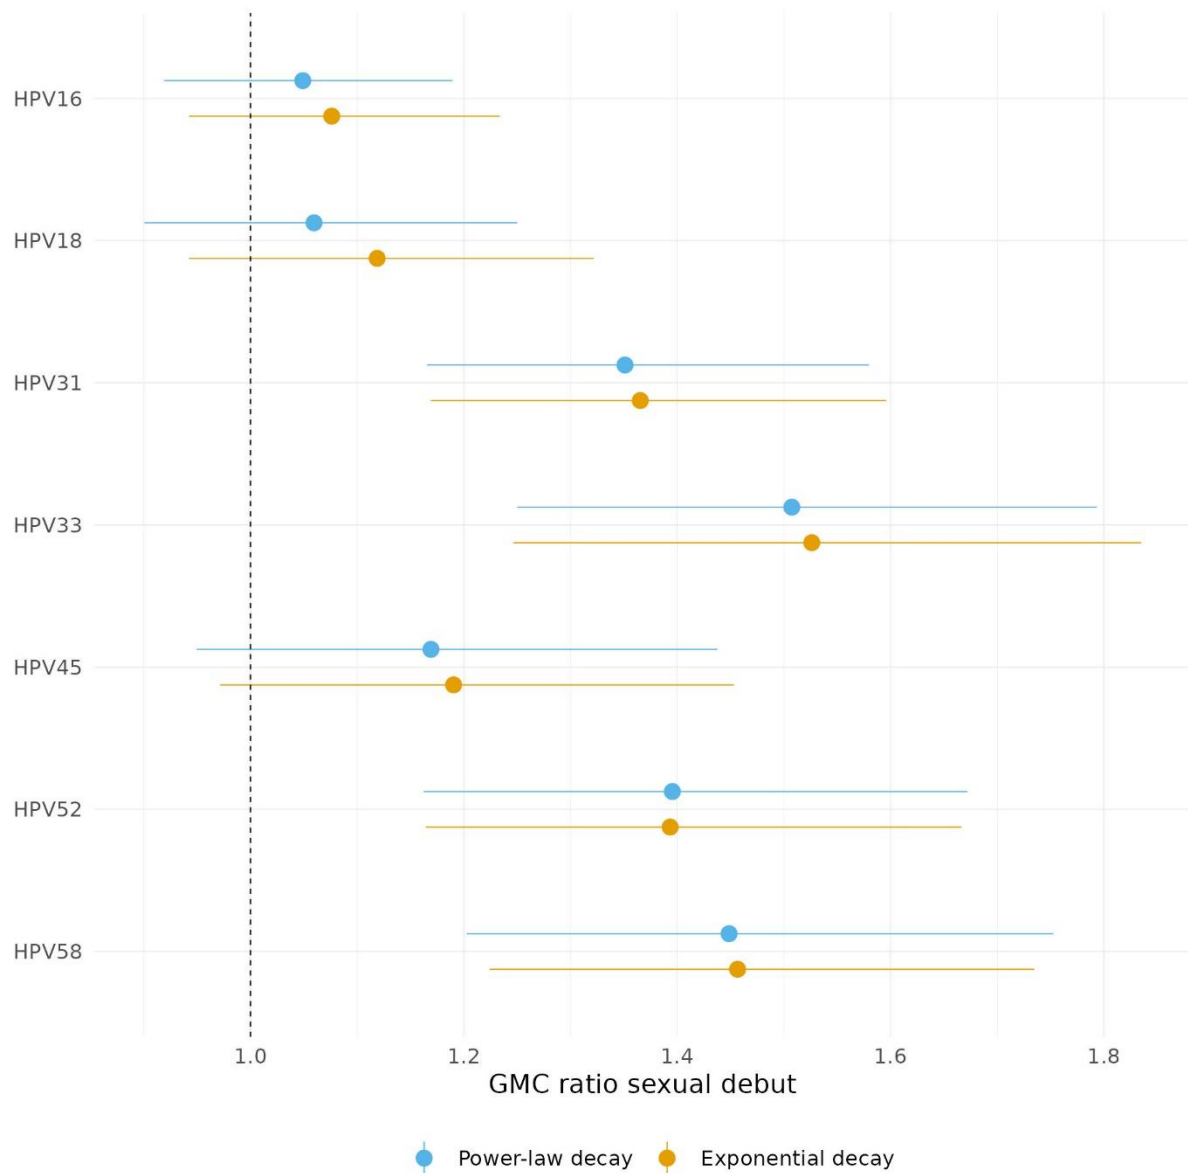

**Supplementary Figure 5.** Estimated GMC ratios for sexual debut and their corresponding 95% CIs for each HPV type for the power-law decay model and exponential decay model.
